# Supplementary material for: Wikipedia, Google Trends and Diet: Assessment of Temporal Trends in the Internet Users’ Searches in Italy before and during COVID-19 Pandemic
Source: Nutrients. 2021 Oct 20;13(11):3683. doi: 10.3390/nu13113683 (PMC8620684; doi:10.3390/nu13113683)
Supplement: Supplementary file 1 [file nutrients-13-03683-s001.zip › nutrients-1411202-supplementary.pdf]

**Supplementary Figure S1.** Google Trends data from 1 January 2004 to 26 March 2021 for the research trends of the word “dieta” (diet in English) in Italy.

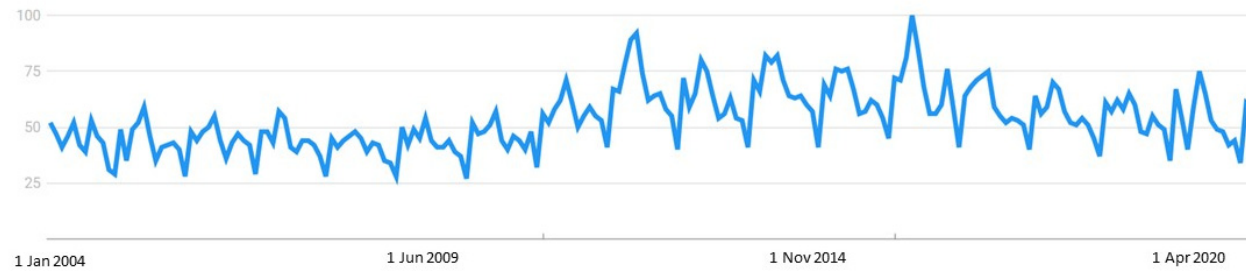

The chart displays the following data series (diets) and their approximate values in 2015 and 2020:

| Diet                   | 2015   | 2020   |
|------------------------|--------|--------|
| Mediterranean diet     | ~6,500 | ~3,000 |
| Ketogenic diet         | ~0     | ~8,500 |
| Vegetarian diet        | ~3,800 | ~1,500 |
| Pescetarianism         | ~4,500 | ~4,200 |
| FODMAP                 | ~4,000 | ~1,500 |
| Acid-base diet         | ~2,500 | ~1,500 |
| Vegan/Vegetarian       | ~1,500 | ~1,000 |
| Blood groups diet      | ~1,000 | ~1,000 |
| Paleolithic/Paleo diet | ~1,000 | ~1,000 |
| Scarsdale diet         | ~500   | ~500   |
| Kousmine method        | ~1,500 | ~1,000 |
| Zone Diet              | ~2,000 | ~1,500 |
| Intermittent fasting   | ~1,000 | ~1,000 |
| Raw foodism            | ~1,000 | ~1,000 |
| Macrobiotics           | ~4,500 | ~1,500 |
| Fruitarianism          | ~4,000 | ~1,500 |

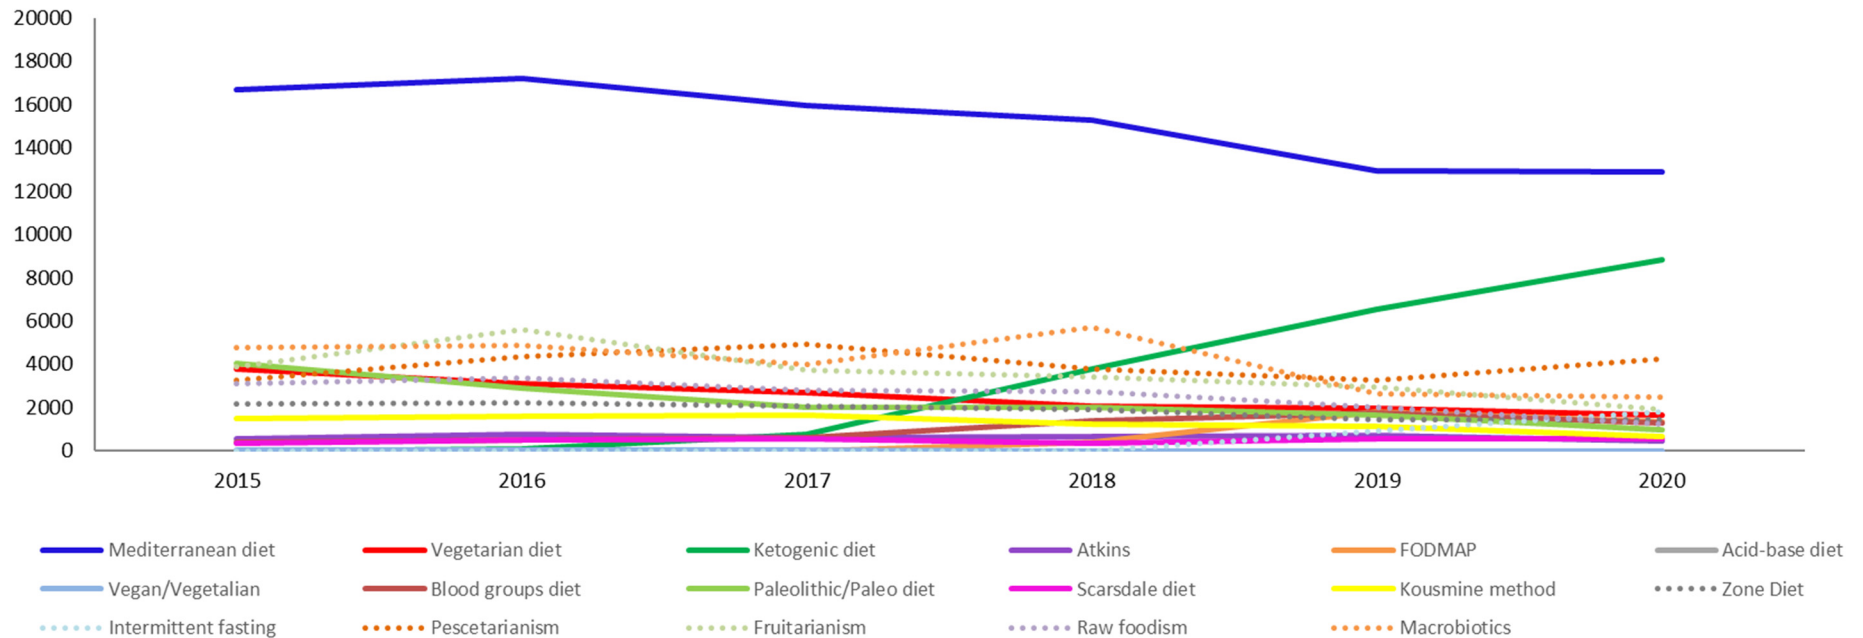

**Supplementary Figure S3. a)** Google Trends data from 1 January 2004 to 26 March 2021 for the research trends of the word “Mario Pianesi” in Italy; **b)** geographical distribution of the search volume.

a)

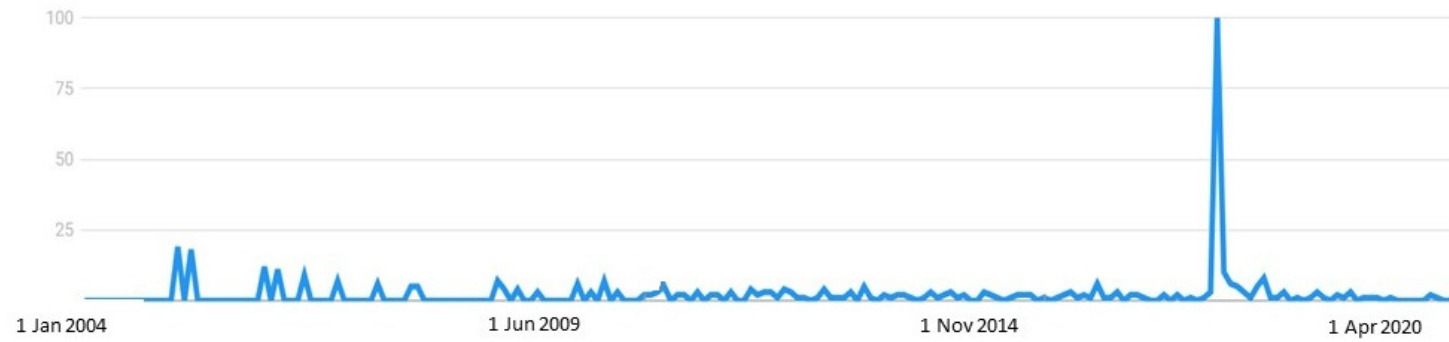

b)

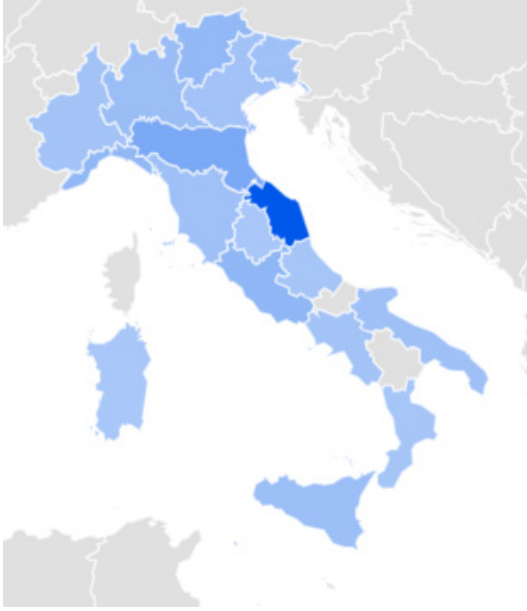

**Supplementary Figure S4.** Number of articles indexed in PubMed by year, for Ketogenic, Mediterranean and Macrobiotic diets.

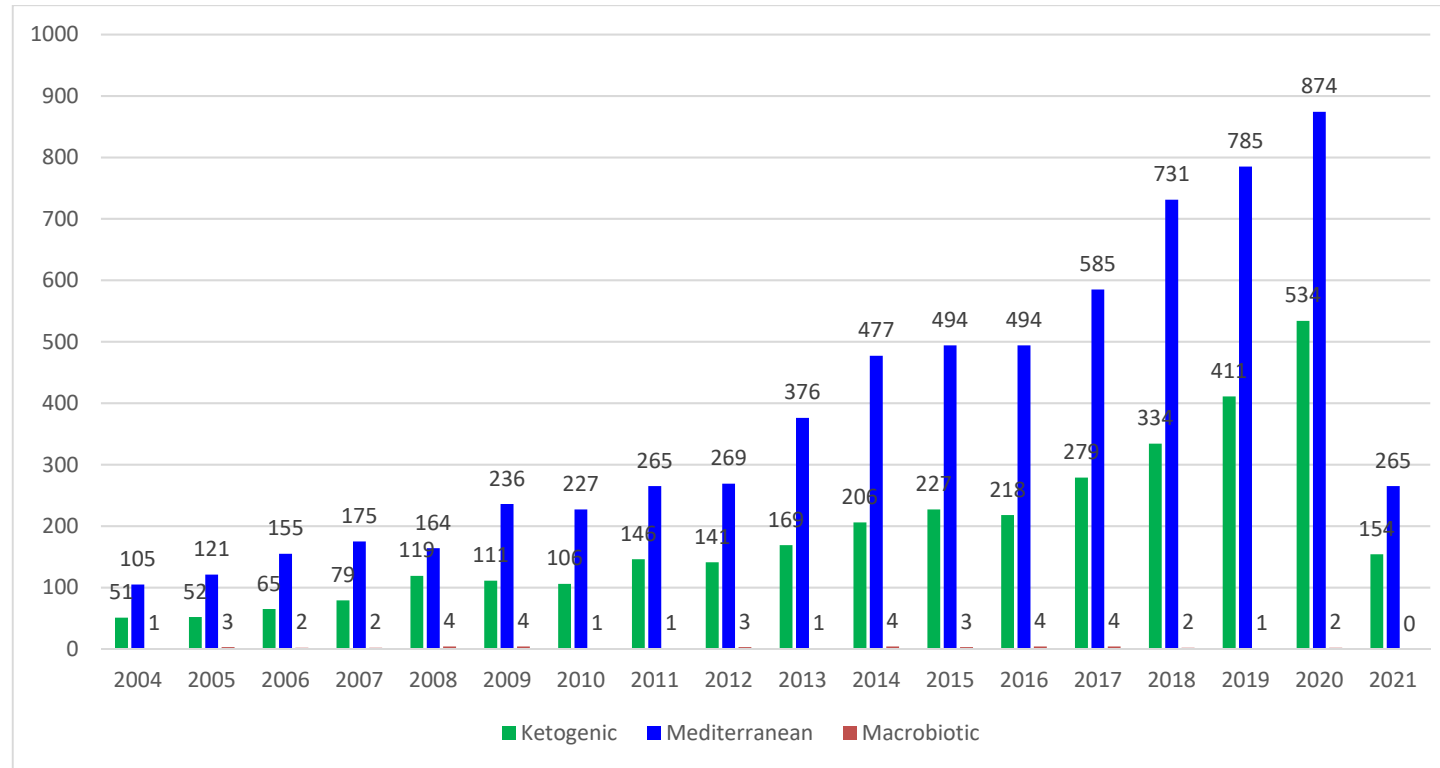

**Supplementary Table S1.** Definitions of the diets analyzed, and differences in the number of times a specific page was viewed by users before and during the COVID-19 pandemic.

| Diets                                | Definition of diets, according to Wikipedia                                                                                                                                                                                                               | Before COVID-19<br>(mean $\pm$ SD) | During COVID-19<br>(mean $\pm$ SD) | p-value           |
|--------------------------------------|-----------------------------------------------------------------------------------------------------------------------------------------------------------------------------------------------------------------------------------------------------------|------------------------------------|------------------------------------|-------------------|
| Mediterranean                        | Diet with high consumption of olive oil, legumes, unrefined cereals, nuts, fruits, and vegetables, moderate to high consumption of fish, moderate consumption of dairy products and wine, and low consumption of other animal products and refined foods. | 15,606.4 $\pm$ 6667.3              | 12,273 $\pm$ 5368.9                | 0.1239            |
| Vegetarian diet<br>(semi-vegetarian) | Diet exclusively based on plants origin foods, without meat (but including eggs, milk and dairy).                                                                                                                                                         | 3174.2 $\pm$ 790.8                 | 2567.2 $\pm$ 573.3                 | <b>0.0185</b>     |
| Ketogenic diet                       | Diet high in fat, with low-moderate protein, and low carbohydrates                                                                                                                                                                                        | 2717.1 $\pm$ 2888.9                | 8887.2 $\pm$ 2008.5                | <b>&lt;0.0001</b> |
| Atkins                               | Low-carbohydrate, high-fat, high-protein diet.                                                                                                                                                                                                            | 658.8 $\pm$ 267.3                  | 456.3 $\pm$ 354.2                  | <b>0.0180</b>     |
| FODMAP                               | Diet with low fermentable carbohydrates recommended for managing patients with irritable bowel syndrome.                                                                                                                                                  | 525.2 $\pm$ 826.3                  | 1265.1 $\pm$ 998.7                 | <b>0.0052</b>     |
| Acid-base diet                       | Diet based on the misconception that different types of food can have an effect on the body pH balance.                                                                                                                                                   | 0.6 $\pm$ 1.2                      | 0.1 $\pm$ 0.3                      | 0.1896            |
| Vegan /<br>Vegetarian                | Diet exclusively based on plants origin foods, without any type of animal products.                                                                                                                                                                       | 11.5 $\pm$ 8.0                     | 5.2 $\pm$ 3.6                      | <b>0.0145</b>     |
| Blood groups diet                    | Diet defined according to the blood group system.                                                                                                                                                                                                         | 1015.4 $\pm$ 674.5                 | 1173.4 $\pm$ 304.8                 | 0.4511            |
| Paleolithic / Paleo<br>diet          | Diet based on roots, meat, nuts, vegetables, fruits, low processed food and no dairy products, grains, sugar, legumes, processed oils, salt, alcohol, and coffee.                                                                                         | 2302.3 $\pm$ 897.3                 | 940.9 $\pm$ 845.8                  | <b>&lt;0.0001</b> |
| Scarsdale diet                       | Low-carbohydrate, high-protein diet with restrictions in some plant-origin foods.                                                                                                                                                                         | 482.5 $\pm$ 172.8                  | 609.7 $\pm$ 290.9                  | 0.0528            |
| Kousmine<br>method                   | Diet based on fruits, vegetables, vitamins supplements and whole grains but with uncooked grain and seed, and no saturated fats.                                                                                                                          | 1395.9 $\pm$ 334.5                 | 598.5 $\pm$ 90.9                   | <b>&lt;0.0001</b> |

|                      |                                                                                                                                                                                                                |                 |                 |                   |
|----------------------|----------------------------------------------------------------------------------------------------------------------------------------------------------------------------------------------------------------|-----------------|-----------------|-------------------|
| Zone Diet            | Low-carbohydrate diet intended to maintain insulin sensitivity, avoiding insulin relieves spikes. Weight reduction is obtained due to calorie restriction.                                                     | 1940.5 ± 664.3  | 1322.2 ± 579.1  | <b>0.0054</b>     |
| Intermittent fasting | Diet based on calorie restriction obtained with alternate-day fasting.                                                                                                                                         | 266.2 ± 572.4   | 1893.4 ± 1460.7 | <b>&lt;0.0001</b> |
| Pescetarianism       | Plant-based diet with seafoods as the only source of meat.                                                                                                                                                     | 3941.8 ± 1339.7 | 4680.2 ± 1175.8 | 0.0936            |
| Fruitarianism        | Diet with only fruits, nuts and seeds.                                                                                                                                                                         | 3833.3 ± 1832.7 | 1962.9 ± 609.0  | <b>0.0014</b>     |
| Raw foodism          | Diet based only on raw foods.                                                                                                                                                                                  | 2728.4 ± 788.8  | 1115.5 ± 268.4  | <b>&lt;0.0001</b> |
| Macrobiotics         | Diet derived by Zen Buddhism, based on a balance between yin (negative) and yang (positive) foods meaning a local and seasonal foods consumption, low animal products intake, and a moderate meal consumption. | 4294.9 ± 3208.4 | 2426.5 ± 333.7  | 0.0595            |
